# Supplementary material
Source: PubMed Central journal article supplement (PMC10117077)

Figure S1. The full Bayesian phylogenetic tree from Figure 1, with no clades collapsed, of 276 virus genomes of SARS-CoV-2 lineage B.1.289, characterized by Spike: H245Y and Orf1b: T67I.

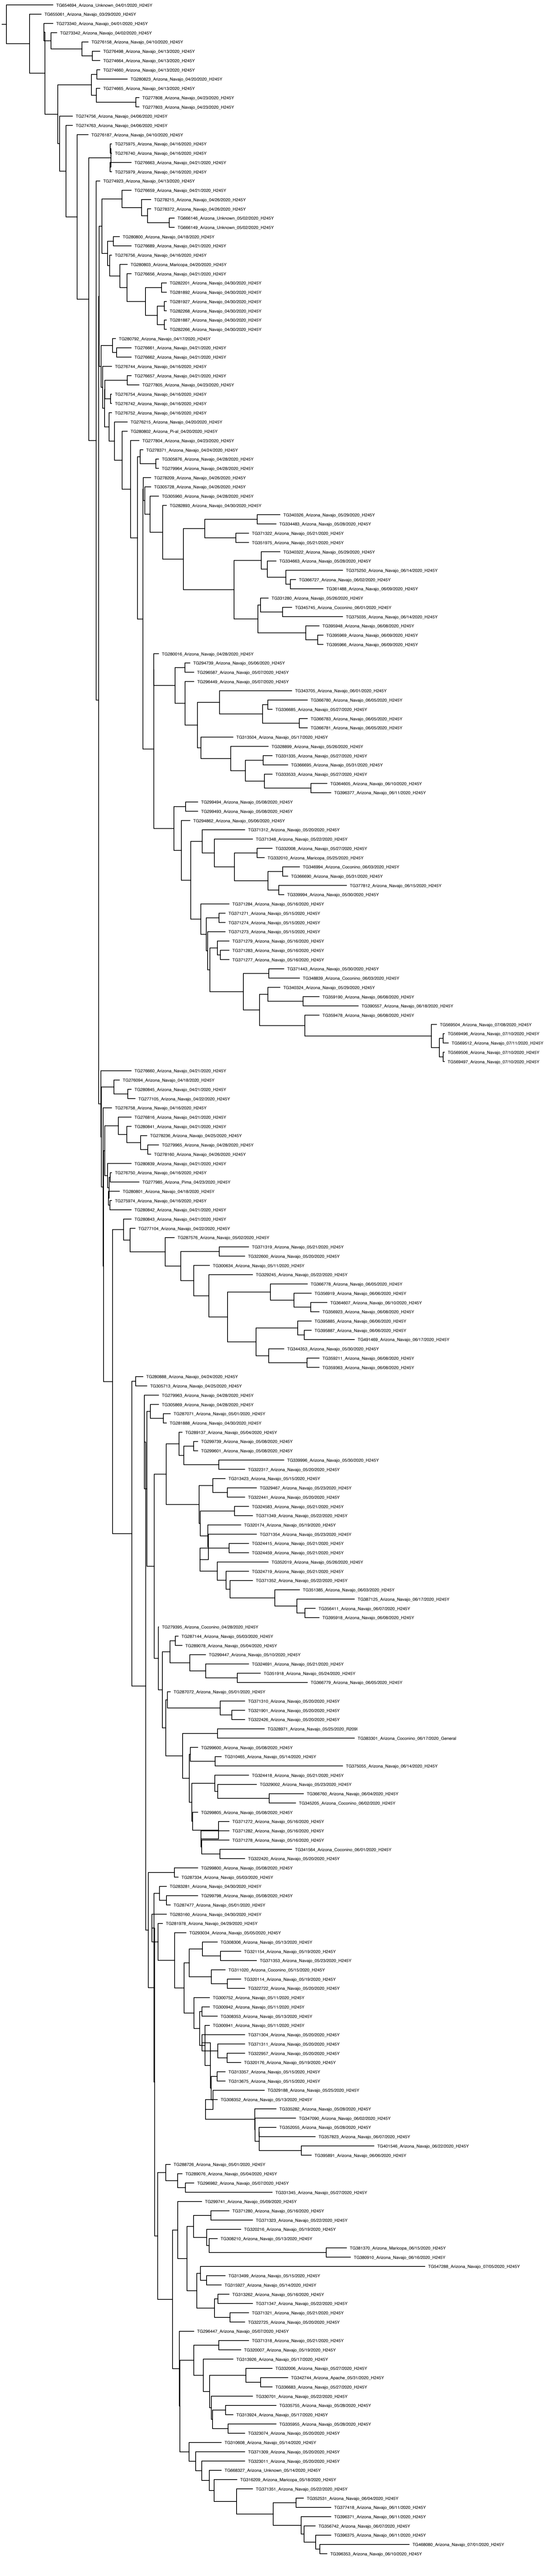

Supplement: msphere.00659-22-s0001.pdf [file msphere.00659-22-s0001.pdf]
