# Supplementary material
Source: PubMed Central journal article supplement (PMC10117077)

Figure S2. The full Bayesian phylogenetic tree from Figure 2, with no clades collapsed, of 456 virus genomes of SARS-CoV-2 lineages B.1.516, characterized by Nucleocapsid: R209I.

TG276516

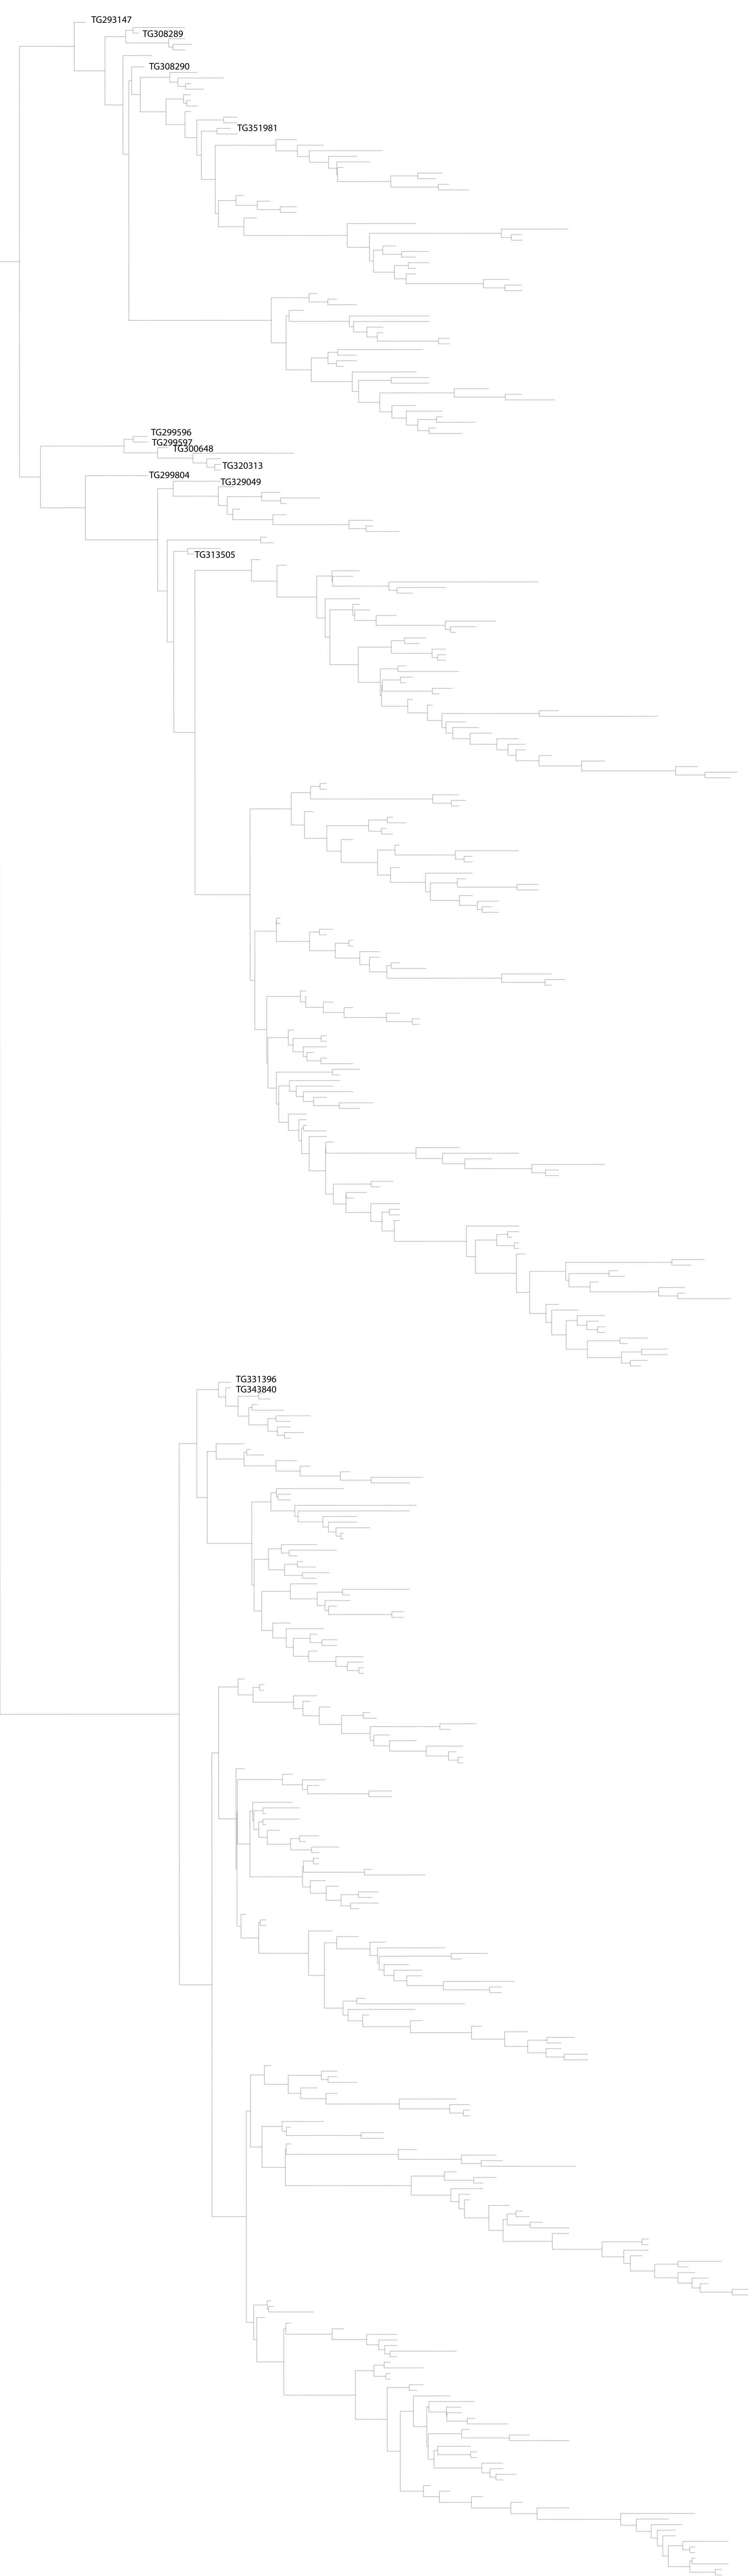

Supplement: msphere.00659-22-s0002.pdf [file msphere.00659-22-s0002.pdf]
