# Supplementary material
Source: PubMed Central journal article supplement (PMC10117077)
Supplement: msphere.00659-22-s0003.pdf [file msphere.00659-22-s0003.pdf]

Table S1. Compilation of GISAID IDs and sample metadata used for Bayesian phylogenetic analyses.

| <b>TG ID</b> | <b>Collection Date</b> | <b>GISAID ID</b> | <b>Mutation</b> |
|--------------|------------------------|------------------|-----------------|
| TG655061     | 3/29/2020              | EPI_ISL_914632   | H245Y           |
| TG273340     | 4/1/2020               | EPI_ISL_694055   | H245Y           |
| TG654694     | 4/1/2020               | EPI_ISL_696015   | H245Y           |
| TG273342     | 4/2/2020               | EPI_ISL_694056   | H245Y           |
| TG274756     | 4/6/2020               | EPI_ISL_694071   | H245Y           |
| TG274763     | 4/6/2020               | EPI_ISL_694072   | H245Y           |
| TG276158     | 4/10/2020              | EPI_ISL_694094   | H245Y           |
| TG276187     | 4/10/2020              | EPI_ISL_694100   | H245Y           |
| TG274660     | 4/13/2020              | EPI_ISL_914040   | H245Y           |
| TG274664     | 4/13/2020              | EPI_ISL_914041   | H245Y           |
| TG274665     | 4/13/2020              | EPI_ISL_15241863 | H245Y           |
| TG274923     | 4/13/2020              | EPI_ISL_914042   | H245Y           |
| TG276498     | 4/13/2020              | EPI_ISL_914049   | H245Y           |
| TG276516     | 4/14/2020              | EPI_ISL_914050   | R209I           |
| TG275974     | 4/16/2020              | EPI_ISL_914044   | H245Y           |
| TG275975     | 4/16/2020              | EPI_ISL_914045   | H245Y           |
| TG275979     | 4/16/2020              | EPI_ISL_15241865 | H245Y           |
| TG276740     | 4/16/2020              | EPI_ISL_694120   | H245Y           |
| TG276742     | 4/16/2020              | EPI_ISL_694121   | H245Y           |
| TG276744     | 4/16/2020              | EPI_ISL_694122   | H245Y           |
| TG276750     | 4/16/2020              | EPI_ISL_694123   | H245Y           |
| TG276752     | 4/16/2020              | EPI_ISL_694124   | H245Y           |
| TG276754     | 4/16/2020              | EPI_ISL_694125   | H245Y           |
| TG276756     | 4/16/2020              | EPI_ISL_694126   | H245Y           |
| TG276758     | 4/16/2020              | EPI_ISL_694127   | H245Y           |
| TG280792     | 4/17/2020              | EPI_ISL_694150   | H245Y           |
| TG276094     | 4/18/2020              | EPI_ISL_914046   | H245Y           |
| TG280800     | 4/18/2020              | EPI_ISL_694154   | H245Y           |
| TG280801     | 4/18/2020              | EPI_ISL_694155   | H245Y           |

|          |           |                  |       |
|----------|-----------|------------------|-------|
| TG276215 | 4/20/2020 | EPI_ISL_914047   | H245Y |
| TG280802 | 4/20/2020 | EPI_ISL_694156   | H245Y |
| TG280803 | 4/20/2020 | EPI_ISL_694157   | H245Y |
| TG280823 | 4/20/2020 | EPI_ISL_694169   | H245Y |
| TG276656 | 4/21/2020 | EPI_ISL_914052   | H245Y |
| TG276659 | 4/21/2020 | EPI_ISL_15241867 | H245Y |
| TG276660 | 4/21/2020 | EPI_ISL_914053   | H245Y |
| TG276661 | 4/21/2020 | EPI_ISL_914054   | H245Y |
| TG276662 | 4/21/2020 | EPI_ISL_914055   | H245Y |
| TG276663 | 4/21/2020 | EPI_ISL_15241869 | H245Y |
| TG276689 | 4/21/2020 | EPI_ISL_15241871 | H245Y |
| TG276816 | 4/21/2020 | EPI_ISL_914056   | H245Y |
| TG280839 | 4/21/2020 | EPI_ISL_694181   | H245Y |
| TG280841 | 4/21/2020 | EPI_ISL_694183   | H245Y |
| TG280842 | 4/21/2020 | EPI_ISL_694184   | H245Y |
| TG280843 | 4/21/2020 | EPI_ISL_694185   | H245Y |
| TG280845 | 4/21/2020 | EPI_ISL_694186   | H245Y |
| TG277104 | 4/22/2020 | EPI_ISL_914057   | H245Y |
| TG277105 | 4/22/2020 | EPI_ISL_15241873 | H245Y |
| TG277803 | 4/23/2020 | EPI_ISL_15241875 | H245Y |
| TG277808 | 4/23/2020 | EPI_ISL_15241877 | H245Y |
| TG277985 | 4/23/2020 | EPI_ISL_694139   | H245Y |
| TG278371 | 4/24/2020 | EPI_ISL_914065   | H245Y |
| TG280888 | 4/24/2020 | EPI_ISL_694215   | H245Y |
| TG278236 | 4/25/2020 | EPI_ISL_914063   | H245Y |
| TG305713 | 4/25/2020 | EPI_ISL_694254   | H245Y |
| TG278160 | 4/26/2020 | EPI_ISL_914059   | H245Y |
| TG278209 | 4/26/2020 | EPI_ISL_914061   | H245Y |
| TG278215 | 4/26/2020 | EPI_ISL_914062   | H245Y |
| TG278372 | 4/26/2020 | EPI_ISL_914066   | H245Y |
| TG305728 | 4/26/2020 | EPI_ISL_694258   | H245Y |
| TG279395 | 4/28/2020 | EPI_ISL_694142   | H245Y |
| TG279963 | 4/28/2020 | EPI_ISL_914067   | H245Y |

|          |           |                 |       |
|----------|-----------|-----------------|-------|
| TG279964 | 4/28/2020 | EPI_ISL_914068  | H245Y |
| TG279965 | 4/28/2020 | EPI_ISL_914069  | H245Y |
| TG280016 | 4/28/2020 | EPI_ISL_914070  | H245Y |
| TG305869 | 4/28/2020 | EPI_ISL_694285  | H245Y |
| TG305876 | 4/28/2020 | EPI_ISL_694287  | H245Y |
| TG305960 | 4/28/2020 | EPI_ISL_694300  | H245Y |
| TG281978 | 4/29/2020 | EPI_ISL_914078  | H245Y |
| TG281887 | 4/30/2020 | EPI_ISL_914073  | H245Y |
| TG281888 | 4/30/2020 | EPI_ISL_8326352 | H245Y |
| TG281892 | 4/30/2020 | EPI_ISL_914074  | H245Y |
| TG281927 | 4/30/2020 | EPI_ISL_914075  | H245Y |
| TG282201 | 4/30/2020 | EPI_ISL_914079  | H245Y |
| TG282266 | 4/30/2020 | EPI_ISL_914080  | H245Y |
| TG282268 | 4/30/2020 | EPI_ISL_914081  | H245Y |
| TG282893 | 4/30/2020 | EPI_ISL_914082  | H245Y |
| TG283160 | 4/30/2020 | EPI_ISL_914083  | H245Y |
| TG283281 | 4/30/2020 | EPI_ISL_914084  | H245Y |
| TG287071 | 5/1/2020  | EPI_ISL_914086  | H245Y |
| TG287072 | 5/1/2020  | EPI_ISL_914087  | H245Y |
| TG287477 | 5/1/2020  | EPI_ISL_914090  | H245Y |
| TG288726 | 5/1/2020  | EPI_ISL_914092  | H245Y |
| TG287576 | 5/2/2020  | EPI_ISL_914091  | H245Y |
| TG666146 | 5/2/2020  | EPI_ISL_696228  | H245Y |
| TG666149 | 5/2/2020  | EPI_ISL_696230  | H245Y |
| TG287144 | 5/3/2020  | EPI_ISL_914088  | H245Y |
| TG287334 | 5/3/2020  | EPI_ISL_914089  | H245Y |
| TG289076 | 5/4/2020  | EPI_ISL_914093  | H245Y |
| TG289078 | 5/4/2020  | EPI_ISL_914094  | H245Y |
| TG289137 | 5/4/2020  | EPI_ISL_914095  | H245Y |
| TG293034 | 5/5/2020  | EPI_ISL_914096  | H245Y |
| TG293147 | 5/5/2020  | EPI_ISL_914097  | R209I |
| TG294739 | 5/6/2020  | EPI_ISL_914098  | H245Y |
| TG296447 | 5/7/2020  | EPI_ISL_914100  | H245Y |

|          |           |                 |       |
|----------|-----------|-----------------|-------|
| TG296449 | 5/7/2020  | EPI_ISL_914101  | H245Y |
| TG296587 | 5/7/2020  | EPI_ISL_914102  | H245Y |
| TG296982 | 5/7/2020  | EPI_ISL_8326387 | H245Y |
| TG299493 | 5/8/2020  | EPI_ISL_914105  | H245Y |
| TG299494 | 5/8/2020  | EPI_ISL_914106  | H245Y |
| TG299600 | 5/8/2020  | EPI_ISL_914109  | H245Y |
| TG299601 | 5/8/2020  | EPI_ISL_914110  | H245Y |
| TG299739 | 5/8/2020  | EPI_ISL_914111  | H245Y |
| TG299798 | 5/8/2020  | EPI_ISL_914113  | H245Y |
| TG299800 | 5/8/2020  | EPI_ISL_914114  | H245Y |
| TG299805 | 5/8/2020  | EPI_ISL_914116  | H245Y |
| TG299596 | 5/8/2020  | EPI_ISL_914107  | R209I |
| TG299597 | 5/8/2020  | EPI_ISL_914108  | R209I |
| TG299804 | 5/8/2020  | EPI_ISL_914115  | R209I |
| TG299741 | 5/9/2020  | EPI_ISL_914112  | H245Y |
| TG299447 | 5/10/2020 | EPI_ISL_914104  | H245Y |
| TG300634 | 5/11/2020 | EPI_ISL_914117  | H245Y |
| TG300941 | 5/11/2020 | EPI_ISL_914120  | H245Y |
| TG300942 | 5/11/2020 | EPI_ISL_914121  | H245Y |
| TG300648 | 5/11/2020 | EPI_ISL_914119  | R209I |
| TG308210 | 5/13/2020 | EPI_ISL_914122  | H245Y |
| TG308306 | 5/13/2020 | EPI_ISL_914125  | H245Y |
| TG308352 | 5/13/2020 | EPI_ISL_914126  | H245Y |
| TG308353 | 5/13/2020 | EPI_ISL_914127  | H245Y |
| TG308289 | 5/13/2020 | EPI_ISL_914123  | R209I |
| TG308290 | 5/13/2020 | EPI_ISL_914124  | R209I |
| TG310465 | 5/14/2020 | EPI_ISL_914128  | H245Y |
| TG310608 | 5/14/2020 | EPI_ISL_914130  | H245Y |
| TG315927 | 5/14/2020 | EPI_ISL_914141  | H245Y |
| TG668327 | 5/14/2020 | EPI_ISL_696256  | H245Y |
| TG311020 | 5/15/2020 | EPI_ISL_694318  | H245Y |
| TG313357 | 5/15/2020 | EPI_ISL_914133  | H245Y |
| TG313423 | 5/15/2020 | EPI_ISL_914134  | H245Y |

|          |           |                 |       |
|----------|-----------|-----------------|-------|
| TG313499 | 5/15/2020 | EPI_ISL_914135  | H245Y |
| TG313675 | 5/15/2020 | EPI_ISL_914138  | H245Y |
| TG371271 | 5/15/2020 | EPI_ISL_694530  | H245Y |
| TG371273 | 5/15/2020 | EPI_ISL_694532  | H245Y |
| TG371274 | 5/15/2020 | EPI_ISL_694533  | H245Y |
| TG313505 | 5/15/2020 | EPI_ISL_914137  | R209I |
| TG313262 | 5/16/2020 | EPI_ISL_914131  | H245Y |
| TG371272 | 5/16/2020 | EPI_ISL_694531  | H245Y |
| TG371277 | 5/16/2020 | EPI_ISL_694536  | H245Y |
| TG371278 | 5/16/2020 | EPI_ISL_694537  | H245Y |
| TG371279 | 5/16/2020 | EPI_ISL_694538  | H245Y |
| TG371280 | 5/16/2020 | EPI_ISL_694539  | H245Y |
| TG371282 | 5/16/2020 | EPI_ISL_694541  | H245Y |
| TG371283 | 5/16/2020 | EPI_ISL_694542  | H245Y |
| TG371284 | 5/16/2020 | EPI_ISL_694543  | H245Y |
| TG313504 | 5/17/2020 | EPI_ISL_914136  | H245Y |
| TG313924 | 5/17/2020 | EPI_ISL_914139  | H245Y |
| TG313926 | 5/17/2020 | EPI_ISL_914140  | H245Y |
| TG316209 | 5/18/2020 | EPI_ISL_694329  | H245Y |
| TG320007 | 5/19/2020 | EPI_ISL_8326409 | H245Y |
| TG320114 | 5/19/2020 | EPI_ISL_914145  | H245Y |
| TG320174 | 5/19/2020 | EPI_ISL_914146  | H245Y |
| TG320176 | 5/19/2020 | EPI_ISL_914147  | H245Y |
| TG320216 | 5/19/2020 | EPI_ISL_914150  | H245Y |
| TG321154 | 5/19/2020 | EPI_ISL_694334  | H245Y |
| TG329049 | 5/19/2020 | EPI_ISL_694346  | R209I |
| TG321901 | 5/20/2020 | EPI_ISL_914152  | H245Y |
| TG322317 | 5/20/2020 | EPI_ISL_914153  | H245Y |
| TG322420 | 5/20/2020 | EPI_ISL_914155  | H245Y |
| TG322426 | 5/20/2020 | EPI_ISL_914156  | H245Y |
| TG322441 | 5/20/2020 | EPI_ISL_914157  | H245Y |
| TG322600 | 5/20/2020 | EPI_ISL_914160  | H245Y |
| TG322722 | 5/20/2020 | EPI_ISL_914162  | H245Y |

|          |           |                 |       |
|----------|-----------|-----------------|-------|
| TG322725 | 5/20/2020 | EPI_ISL_694336  | H245Y |
| TG322957 | 5/20/2020 | EPI_ISL_914165  | H245Y |
| TG323011 | 5/20/2020 | EPI_ISL_914166  | H245Y |
| TG323074 | 5/20/2020 | EPI_ISL_914167  | H245Y |
| TG371304 | 5/20/2020 | EPI_ISL_694559  | H245Y |
| TG371309 | 5/20/2020 | EPI_ISL_694562  | H245Y |
| TG371310 | 5/20/2020 | EPI_ISL_694563  | H245Y |
| TG371311 | 5/20/2020 | EPI_ISL_694564  | H245Y |
| TG371312 | 5/20/2020 | EPI_ISL_694565  | H245Y |
| TG324415 | 5/21/2020 | EPI_ISL_8326413 | H245Y |
| TG324418 | 5/21/2020 | EPI_ISL_8326414 | H245Y |
| TG324459 | 5/21/2020 | EPI_ISL_914171  | H245Y |
| TG324583 | 5/21/2020 | EPI_ISL_914174  | H245Y |
| TG324691 | 5/21/2020 | EPI_ISL_914175  | H245Y |
| TG324719 | 5/21/2020 | EPI_ISL_914176  | H245Y |
| TG351975 | 5/21/2020 | EPI_ISL_694410  | H245Y |
| TG371318 | 5/21/2020 | EPI_ISL_694569  | H245Y |
| TG371319 | 5/21/2020 | EPI_ISL_694570  | H245Y |
| TG371321 | 5/21/2020 | EPI_ISL_694571  | H245Y |
| TG371322 | 5/21/2020 | EPI_ISL_694572  | H245Y |
| TG329245 | 5/22/2020 | EPI_ISL_914185  | H245Y |
| TG330701 | 5/22/2020 | EPI_ISL_914189  | H245Y |
| TG371323 | 5/22/2020 | EPI_ISL_694573  | H245Y |
| TG371347 | 5/22/2020 | EPI_ISL_694589  | H245Y |
| TG371348 | 5/22/2020 | EPI_ISL_694590  | H245Y |
| TG371349 | 5/22/2020 | EPI_ISL_694591  | H245Y |
| TG371351 | 5/22/2020 | EPI_ISL_694593  | H245Y |
| TG371352 | 5/22/2020 | EPI_ISL_694594  | H245Y |
| TG329002 | 5/23/2020 | EPI_ISL_914182  | H245Y |
| TG329467 | 5/23/2020 | EPI_ISL_914187  | H245Y |
| TG371353 | 5/23/2020 | EPI_ISL_694595  | H245Y |
| TG371354 | 5/23/2020 | EPI_ISL_8326423 | H245Y |
| TG351918 | 5/24/2020 | EPI_ISL_694405  | H245Y |

|          |           |                 |       |
|----------|-----------|-----------------|-------|
| TG329188 | 5/25/2020 | EPI_ISL_914183  | H245Y |
| TG332010 | 5/25/2020 | EPI_ISL_694353  | H245Y |
| TG328971 | 5/25/2020 | EPI_ISL_914181  | R209I |
| TG328899 | 5/26/2020 | EPI_ISL_914179  | H245Y |
| TG331280 | 5/26/2020 | EPI_ISL_914191  | H245Y |
| TG352019 | 5/26/2020 | EPI_ISL_694418  | H245Y |
| TG331335 | 5/27/2020 | EPI_ISL_914192  | H245Y |
| TG331345 | 5/27/2020 | EPI_ISL_8326430 | H245Y |
| TG332006 | 5/27/2020 | EPI_ISL_914198  | H245Y |
| TG332008 | 5/27/2020 | EPI_ISL_914199  | H245Y |
| TG333533 | 5/27/2020 | EPI_ISL_914200  | H245Y |
| TG336683 | 5/27/2020 | EPI_ISL_914209  | H245Y |
| TG336685 | 5/27/2020 | EPI_ISL_914210  | H245Y |
| TG331396 | 5/27/2020 | EPI_ISL_914193  | R209I |
| TG343840 | 5/27/2020 | EPI_ISL_694383  | R209I |
| TG334483 | 5/28/2020 | EPI_ISL_914201  | H245Y |
| TG334663 | 5/28/2020 | EPI_ISL_914202  | H245Y |
| TG335282 | 5/28/2020 | EPI_ISL_914205  | H245Y |
| TG335755 | 5/28/2020 | EPI_ISL_914207  | H245Y |
| TG335955 | 5/28/2020 | EPI_ISL_914208  | H245Y |
| TG352055 | 5/28/2020 | EPI_ISL_694426  | H245Y |
| TG340322 | 5/29/2020 | EPI_ISL_914218  | H245Y |
| TG340324 | 5/29/2020 | EPI_ISL_914219  | H245Y |
| TG340326 | 5/29/2020 | EPI_ISL_8326435 | H245Y |
| TG339994 | 5/30/2020 | EPI_ISL_914213  | H245Y |
| TG339996 | 5/30/2020 | EPI_ISL_914214  | H245Y |
| TG344353 | 5/30/2020 | EPI_ISL_694384  | H245Y |
| TG371443 | 5/30/2020 | EPI_ISL_694600  | H245Y |
| TG342744 | 5/31/2020 | EPI_ISL_694382  | H245Y |
| TG366690 | 5/31/2020 | EPI_ISL_694458  | H245Y |
| TG366695 | 5/31/2020 | EPI_ISL_694461  | H245Y |
| TG341564 | 6/1/2020  | EPI_ISL_694378  | H245Y |
| TG343705 | 6/1/2020  | EPI_ISL_914233  | H245Y |

|          |           |                |       |
|----------|-----------|----------------|-------|
| TG345745 | 6/1/2020  | EPI_ISL_694390 | H245Y |
| TG345205 | 6/2/2020  | EPI_ISL_694037 | H245Y |
| TG347090 | 6/2/2020  | EPI_ISL_914247 | H245Y |
| TG366727 | 6/2/2020  | EPI_ISL_694488 | H245Y |
| TG346994 | 6/3/2020  | EPI_ISL_694393 | H245Y |
| TG348839 | 6/3/2020  | EPI_ISL_694397 | H245Y |
| TG351385 | 6/3/2020  | EPI_ISL_914253 | H245Y |
| TG352531 | 6/4/2020  | EPI_ISL_914258 | H245Y |
| TG366760 | 6/4/2020  | EPI_ISL_694507 | H245Y |
| TG366778 | 6/5/2020  | EPI_ISL_694518 | H245Y |
| TG366779 | 6/5/2020  | EPI_ISL_694519 | H245Y |
| TG366780 | 6/5/2020  | EPI_ISL_694520 | H245Y |
| TG366781 | 6/5/2020  | EPI_ISL_694521 | H245Y |
| TG366783 | 6/5/2020  | EPI_ISL_694522 | H245Y |
| TG356919 | 6/6/2020  | EPI_ISL_914278 | H245Y |
| TG395885 | 6/6/2020  | EPI_ISL_694730 | H245Y |
| TG395887 | 6/6/2020  | EPI_ISL_694732 | H245Y |
| TG395891 | 6/6/2020  | EPI_ISL_694735 | H245Y |
| TG356411 | 6/7/2020  | EPI_ISL_914265 | H245Y |
| TG356742 | 6/7/2020  | EPI_ISL_914277 | H245Y |
| TG357823 | 6/7/2020  | EPI_ISL_914282 | H245Y |
| TG356923 | 6/8/2020  | EPI_ISL_914279 | H245Y |
| TG359190 | 6/8/2020  | EPI_ISL_914291 | H245Y |
| TG359211 | 6/8/2020  | EPI_ISL_914294 | H245Y |
| TG359363 | 6/8/2020  | EPI_ISL_914295 | H245Y |
| TG359478 | 6/8/2020  | EPI_ISL_914298 | H245Y |
| TG395918 | 6/8/2020  | EPI_ISL_694759 | H245Y |
| TG395948 | 6/8/2020  | EPI_ISL_694781 | H245Y |
| TG361488 | 6/9/2020  | EPI_ISL_914303 | H245Y |
| TG395966 | 6/9/2020  | EPI_ISL_694791 | H245Y |
| TG395969 | 6/9/2020  | EPI_ISL_694794 | H245Y |
| TG364605 | 6/10/2020 | EPI_ISL_914318 | H245Y |
| TG364607 | 6/10/2020 | EPI_ISL_914319 | H245Y |



|          |           |                |       |
|----------|-----------|----------------|-------|
| TG396353 | 6/10/2020 | EPI_ISL_694811 | H245Y |
| TG377418 | 6/11/2020 | EPI_ISL_914353 | H245Y |
| TG396371 | 6/11/2020 | EPI_ISL_694826 | H245Y |
| TG396375 | 6/11/2020 | EPI_ISL_694829 | H245Y |
| TG396377 | 6/11/2020 | EPI_ISL_694830 | H245Y |
| TG375035 | 6/14/2020 | EPI_ISL_914328 | H245Y |
| TG375055 | 6/14/2020 | EPI_ISL_914329 | H245Y |
| TG375250 | 6/14/2020 | EPI_ISL_914330 | H245Y |
| TG377812 | 6/15/2020 | EPI_ISL_914361 | H245Y |
| TG381370 | 6/15/2020 | EPI_ISL_694660 | H245Y |
| TG380910 | 6/16/2020 | EPI_ISL_914374 | H245Y |
| TG387125 | 6/17/2020 | EPI_ISL_914389 | H245Y |
| TG491469 | 6/17/2020 | EPI_ISL_695104 | H245Y |
| TG390557 | 6/18/2020 | EPI_ISL_914391 | H245Y |
| TG401546 | 6/22/2020 | EPI_ISL_914424 | H245Y |
| TG468080 | 7/1/2020  | EPI_ISL_914490 | H245Y |
| TG547288 | 7/5/2020  | EPI_ISL_695463 | H245Y |
| TG569504 | 7/8/2020  | EPI_ISL_695588 | H245Y |
| TG569496 | 7/10/2020 | EPI_ISL_695583 | H245Y |
| TG569497 | 7/10/2020 | EPI_ISL_695584 | H245Y |
| TG569506 | 7/10/2020 | EPI_ISL_695590 | H245Y |
| TG569512 | 7/11/2020 | EPI_ISL_695594 | H245Y |
